# Supplementary material
Source: publisher figshare collection journal article supplement (https://acs.figshare.com/ndownloader/files/4165177)
Supplement: Supplementary file 1 [file 4165177]

## **Supporting Information**

### **Generation of an Isolable, Monomeric Manganese(V)-Oxo Complex from O<sub>2</sub> and Visible Light**

Katharine A. Prokop and David P. Goldberg\*

Department of Chemistry, The Johns Hopkins University, Baltimore, Maryland, 21218

**General.** The complexes  $(\text{TBP}_8\text{Cz})\text{Mn}^{\text{III}}$  (**1**) and  $[(\text{TBP}_8\text{Cz})\text{P}(\text{OH})]\text{OH}$  ( $\text{TBP}_8\text{Cz}$  = octakis(*p*-*tert*-butylphenyl)corrolazinato<sup>3-</sup>) were synthesized according to published methods.<sup>1,2</sup> Toluene was purified via a Pure-Solv solvent purification system from Innovative Technologies, Inc. Dioxygen gas (2.6 grade) was purchased from BOC Gases and dried by passage through a column of Drierite.  $\text{H}_2^{18}\text{O}$  (97%  $^{18}\text{O}$ ) was purchased from Cambridge Isotopes, Inc., and  $^{18}\text{O}_2$  (98%  $^{18}\text{O}$ ) was purchased from ICON (Isotope) Services, Inc. 9,10-dimethylantracene was purchased from TCI. Cyclohexane was purified by washing with concentrated  $\text{H}_2\text{SO}_4$ , followed by water and 5% NaOH until neutral. It was then dried with  $\text{MgSO}_4$  and distilled from  $\text{CaH}_2$ .  $\text{PPh}_3$  was recrystallized from hexanes as described in published procedures.<sup>3</sup> All other solvents and reagents were purchased from commercial sources at the highest available purity and used as received, unless otherwise noted.

**Instrumentation.** UV-vis spectroscopy was performed on a Hewlett-Packard 8542 diode-array spectrophotometer equipped with HPChemstation software. The light source was a General Electric Sunlamp Model RSK6A equipped with a 275-Watt bulb. For monitoring by UV-vis, reactions were run in a quartz cuvette (3 mL, 1 cm path length). The light source was positioned ~15 cm from the reaction mixture, and a 400 nm long-pass filter was placed directly between the quartz cuvette and light source. LDI-TOF mass spectrometry was conducted on a Bruker Autoflex III TOF/TOF instrument equipped with a nitrogen laser at 335 nm using an MTP 384 ground steel target plate.  $^1\text{H}$ -NMR and  $^{31}\text{P}$ -NMR spectra were recorded on a Bruker Avance 400 MHz NMR spectrometer at 298 K. All spectra were recorded in 5-mm o.d. NMR tubes, and chemical shifts were reported as  $\delta$  values from standard peaks.

**Laser Desorption Ionization Mass Spectrometry.** For a typical experiment, an aliquot of sample dissolved in a small amount of solvent was transferred quickly to the steel target plate and allowed to evaporate to dryness, until a thin layer of compound remained on the target plate. LDI-TOF mass spectra were obtained in positive ion reflectron mode. Spectra were accumulated in multiples of 250 laser shots at a frequency of 200 Hz to a sum of 1000 shots total. Samples were deposited neat without the use of matrix, as done previously for metallocorrolazines<sup>4,5</sup> and for other metalloporphyrins<sup>6</sup> that can be analyzed in neat form. All mass assignments were made via external calibration using peptide ions as calibrants.

**Aerobic Oxidation of (TBP<sub>8</sub>Cz)Mn<sup>III</sup> (1) for UV-vis Spectroscopy.** An aerobic solution of **1** (12  $\mu$ M) in cyclohexane or toluene (2.5 mL) in a quartz cuvette was continuously irradiated with visible light ( $\lambda_{\text{irr}} > 400$  nm) at 23 °C for 20 min. A color change from green-brown to green occurred. The reaction was monitored by UV-vis spectroscopy and showed the complete isosbestic conversion of **1** ( $\lambda_{\text{max}}(\text{C}_6\text{H}_{12}) = 432, 687$  nm,  $\lambda_{\text{max}}(\text{toluene}) = 434, 689$  nm) to (TBP<sub>8</sub>Cz)Mn<sup>V</sup>(O) **2** ( $\lambda_{\text{max}}(\text{C}_6\text{H}_{12}) = 419, 639$  nm,  $\lambda_{\text{max}}(\text{toluene}) = 419, 634$  nm).

**Aerobic Oxidation of (1) for Isolation as a Solid.** An aerobic solution of **1** (12  $\mu$ M) in cyclohexane (25 mL) was continuously irradiated ( $\lambda_{\text{irr}} > 400$  nm) 23 °C for 20 min. In this case, the reaction was run in a pyrex round-bottom flask, confirming that  $\lambda_{\text{irr}} > 400$  nm is sufficient for the reaction to proceed. A color change from green-brown to green occurred. The reaction mixture was then dried under vacuum. The green solid was redissolved in CH<sub>2</sub>Cl<sub>2</sub> and transferred onto a silica gel column (10 x 2 cm) and eluted as a green band with CH<sub>2</sub>Cl<sub>2</sub>.  $R_f = 0.9$ . <sup>1</sup>H NMR (400 MHz, CD<sub>2</sub>Cl<sub>2</sub>):  $\delta$  (ppm), 8.42-8.39 (m,

8H), 8.05 (d,  $J = 8.4$  Hz, 4H), 7.75-7.70 (m, 8H), 7.61-7.52 (m, 8H), 7.25 (d,  $J = 8.4$  Hz, 4H), 1.522 (s, 18H), 1.518 (s, 18H), 1.44 (s, 18H), 1.40 (s, 18H). UV-vis ( $\text{CH}_2\text{Cl}_2$ ):  $\lambda_{\text{max}}$  (nm) ( $\epsilon \times 10^{-4} \text{ M}^{-1} \text{ cm}^{-1}$ ) 418 (6.29) (soret), 634 (1.99) (Q band). LDI-TOF  $m/z$  isotopic cluster centered at 1426.8 ( $\text{M}^+$ ).

**Preparation of  $(\text{TBP}_8\text{Cz})\text{Mn}^{\text{V}}(^{18}\text{O})$ .** To a solution of **1** (10  $\mu\text{M}$ ) in toluene (2.5 mL) under a  $\text{N}_2$  atmosphere was added 10 mL of  $^{18}\text{O}_2$  transferred via gas-tight syringe. The reaction was performed in a quartz cuvette and continuously irradiated ( $\lambda_{\text{irr}} > 400$  nm) for 20 min at 23  $^\circ\text{C}$ . The reaction was monitored by UV-vis spectroscopy to ensure full formation of **2**. The reaction mixture was then concentrated under vacuum to approx. 100  $\mu\text{L}$  and transferred under a stream of Ar to the target plate. LDI-TOF:  $m/z$  isotopic cluster centered at 1427.7 (55%  $^{18}\text{O}$  incorporation based on simulated spectral fitting to the observed isotopic pattern).

**Aerobic Oxidation of (1) in the Presence of  $\text{H}_2^{18}\text{O}$ .** To an aerobic solution of **1** (12  $\mu\text{M}$ ) in cyclohexane (2.5 mL) was added 25  $\mu\text{L}$  of  $\text{H}_2^{18}\text{O}$ . The reaction was performed in a quartz cuvette and continuously irradiated ( $\lambda_{\text{irr}} > 400$  nm) for 20 min. Isosbestic conversion of **1** ( $\lambda_{\text{max}} = 432, 687$  nm) to **2** ( $\lambda_{\text{max}} = 419, 639$  nm) was observed by UV-vis spectroscopy. LDI-TOF  $m/z$  (percent intensity): isotopic cluster centered at 1426.8 ( $\text{M}^+$ , 100%, no  $^{18}\text{O}$  incorporation).

**Photocatalytic Oxidation of  $\text{PPh}_3$ .** In a typical reaction, to an aerobic solution of **1** (10  $\mu\text{M}$ ) in  $\text{C}_6\text{H}_{12}$  (3 mL) in a quartz cuvette was added excess  $\text{PPh}_3$  (13 mM). The solution was stirred and continuously irradiated ( $\lambda_{\text{irr}} > 400$  nm) for 20 – 60 min at 23  $^\circ\text{C}$ . The reaction mixture was then concentrated to dryness under vacuum and redissolved in  $\text{CDCl}_3$ . The yield of  $\text{O=PPh}_3$  was analyzed by  $^{31}\text{P}$  NMR spectroscopy by determining the

ratio of  $\text{PPh}_3$  to  $\text{OPPh}_3$  from spectral integrations. For solutions involving excess  $\text{O}_2$ , a stream of dry dioxygen gas was purged through the solvent during irradiation.

**Aerobic Oxidation of (1) in the Presence of the Singlet Oxygen Trap 9,10-Dimethylanthracene (DMA).** To an aerobic solution of DMA (0.24 mM) in cyclohexane (3 mL) was added complex **1** (18  $\mu\text{M}$ ). The solution was continuously irradiated ( $\lambda_{\text{irr}} > 400 \text{ nm}$ ) in a quartz cuvette at 23 °C. The reaction mixture was monitored by UV-vis spectroscopy in 10 min intervals, and complete conversion of **1** ( $\lambda_{\text{max}} = 432, 687 \text{ nm}$ ) to **2** ( $\lambda_{\text{max}} = 419, 639 \text{ nm}$ ) was observed after 20 min. The peaks corresponding to DMA (300 – 400 nm) were observed both before and after irradiation (Figure 3), indicating no significant loss of DMA.

**Irradiation of [(TBP<sub>8</sub>Cz)P(OH)]OH in the Presence of DMA.** To an aerobic solution of 9,10-dimethylanthracene (DMA, 0.24 mM) in cyclohexane (3 mL) was added phosphorus corrolazine [(TBP<sub>8</sub>Cz)P(OH)]OH, 6.2  $\mu\text{M}$ ). The solution was continuously irradiated ( $\lambda_{\text{irr}} > 400 \text{ nm}$ ) in a quartz cuvette. The reaction mixture was monitored by UV-vis spectroscopy after 10 min. and showed complete loss of peaks for DMA (300 – 400 nm), indicating the generation and trapping of singlet  $\text{O}_2$  (Figure S2).

**Aerobic Oxidation of (1) with AIBN.** To an aerobic solution of **1** (8  $\mu\text{M}$ ) in cyclohexane (2.5 mL) was added AIBN (12 mM). The reaction was carried out in the dark at 50 °C (heated to initiate radical formation from AIBN). The UV-vis spectrum of the reaction mixture was obtained after 20 min and showed complete conversion of **1** ( $\lambda_{\text{max}} = 432, 687 \text{ nm}$ ) to **2** ( $\lambda_{\text{max}} = 419, 639 \text{ nm}$ ) (Figure S4).

## References.

- (1) Lansky, D. E.; Mandimutsira, B.; Ramdhanie, B.; Clausen, M.; Penner-Hahn, J.; Zvyagin, S. A.; Telser, J.; Krzystek, J.; Zhan, R.; Ou, Z.; Kadish, K. M.; Zakharov, L.; Rheingold, A. L.; Goldberg, D. P. *Inorg. Chem.* **2005**, *44*, 4485-4498.
- (2) Ramdhanie, B.; Stern, C. L.; Goldberg, D. P. *J. Am. Chem. Soc.* **2001**, *123*, 9447-9448.
- (3) Armarego, W. L. F., Perrin D. D. *Purification of Laboratory Chemicals*; 4th ed.; Butterworth-Heinemann: Oxford, UK, 1997.
- (4) Prokop, K. A.; de Visser, S. P.; Goldberg, D. P. *Angew. Chem. Int. Ed.* **2010**, *49*, 5091-5095.
- (5) Prokop, K. A.; Neu, H. M.; de Visser, S. P.; Goldberg, D. P. *J. Am. Chem. Soc.* **2011**, *133*, 15874-15877.
- (6) Srinivasan, N.; Haney, C. A.; Lindsey, J. S.; Zhang, W. Z.; Chait, B. T. *J Porphyrins Phthalocyanines* **1999**, *3*, 283-291.

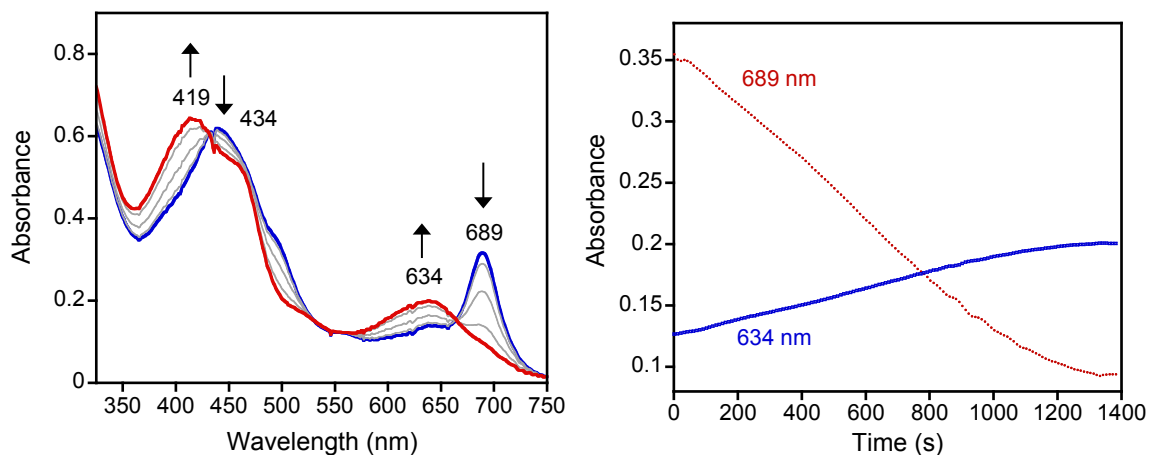

**Figure S1.** Time resolved UV-vis spectra of **1** (11  $\mu\text{M}$ ) in toluene (2.5 mL) continuously irradiated ( $\lambda_{\text{irr}} > 400 \text{ nm}$ ) at 23  $^{\circ}\text{C}$  (left) with corresponding time profile (right) showing the loss of **1** (689 nm) and the formation of **2** (634 nm).

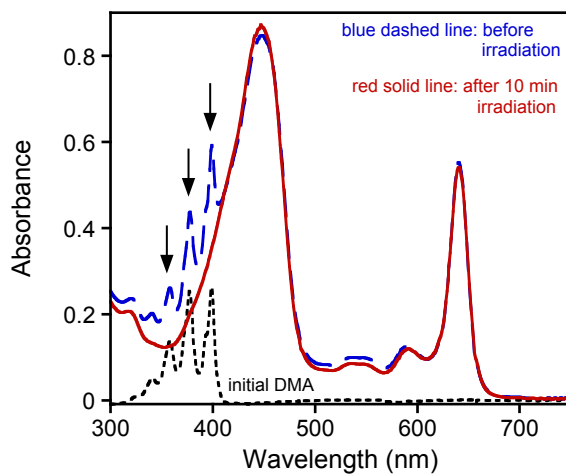

**Figure S2.** UV-vis spectra of  $[(\text{TBP}_8\text{Cz})\text{P}(\text{OH})]\text{OH}$  (6.2  $\mu\text{M}$ ) and 9,10-dimethylantracene (0.24 mM) in cyclohexane (3 mL) (blue dashed line) and following irradiation ( $\lambda_{\text{irr}} > 400 \text{ nm}$ ) for 10 min (red solid line).

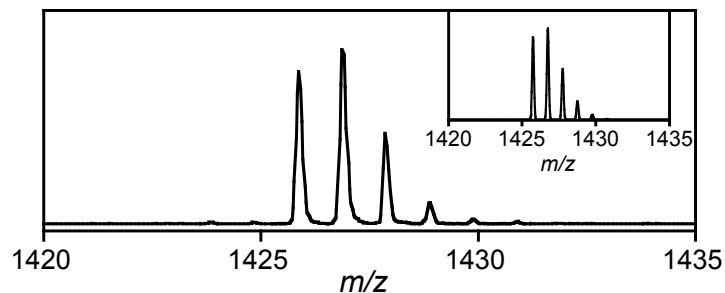

**Figure S3.** LDI-MS of **2** derived from the aerobic oxidation of **1** in a solution of toluene and  $\text{H}_2^{18}\text{O}$ . Calculated isotope pattern for **2** (insert) matches the experimental pattern, which shows no  $^{18}\text{O}$  incorporation.

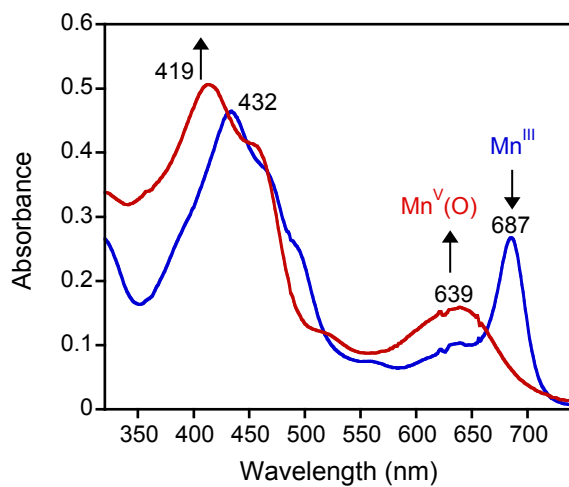

**Figure S4.** Initial (blue) and final (red) UV-vis spectra for the aerobic reaction between **1** ( $8\ \mu\text{M}$ ) and AIBN ( $12\ \text{mM}$ ) in cyclohexane ( $2.5\ \text{mL}$ ).



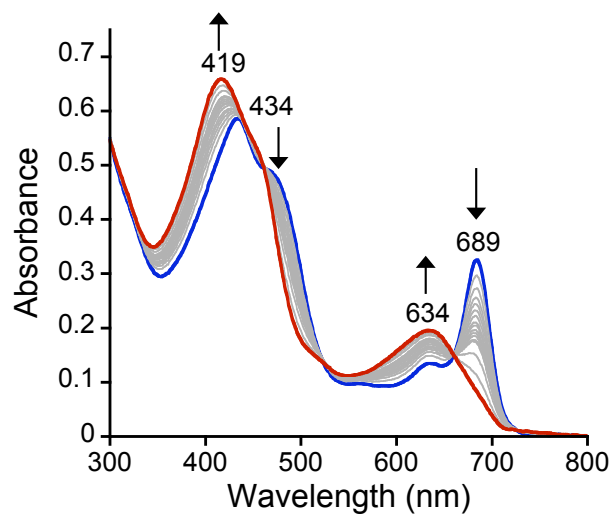

**Figure S5.** Time-resolved UV-vis spectra for the reaction between  $(\text{TBP}_8\text{Cz})\text{Mn}^{\text{III}}$  (10  $\mu\text{M}$ ) and  $t\text{-BuOOH}$  (50 mM) in  $\text{CH}_2\text{Cl}_2$  at 23  $^\circ\text{C}$ .

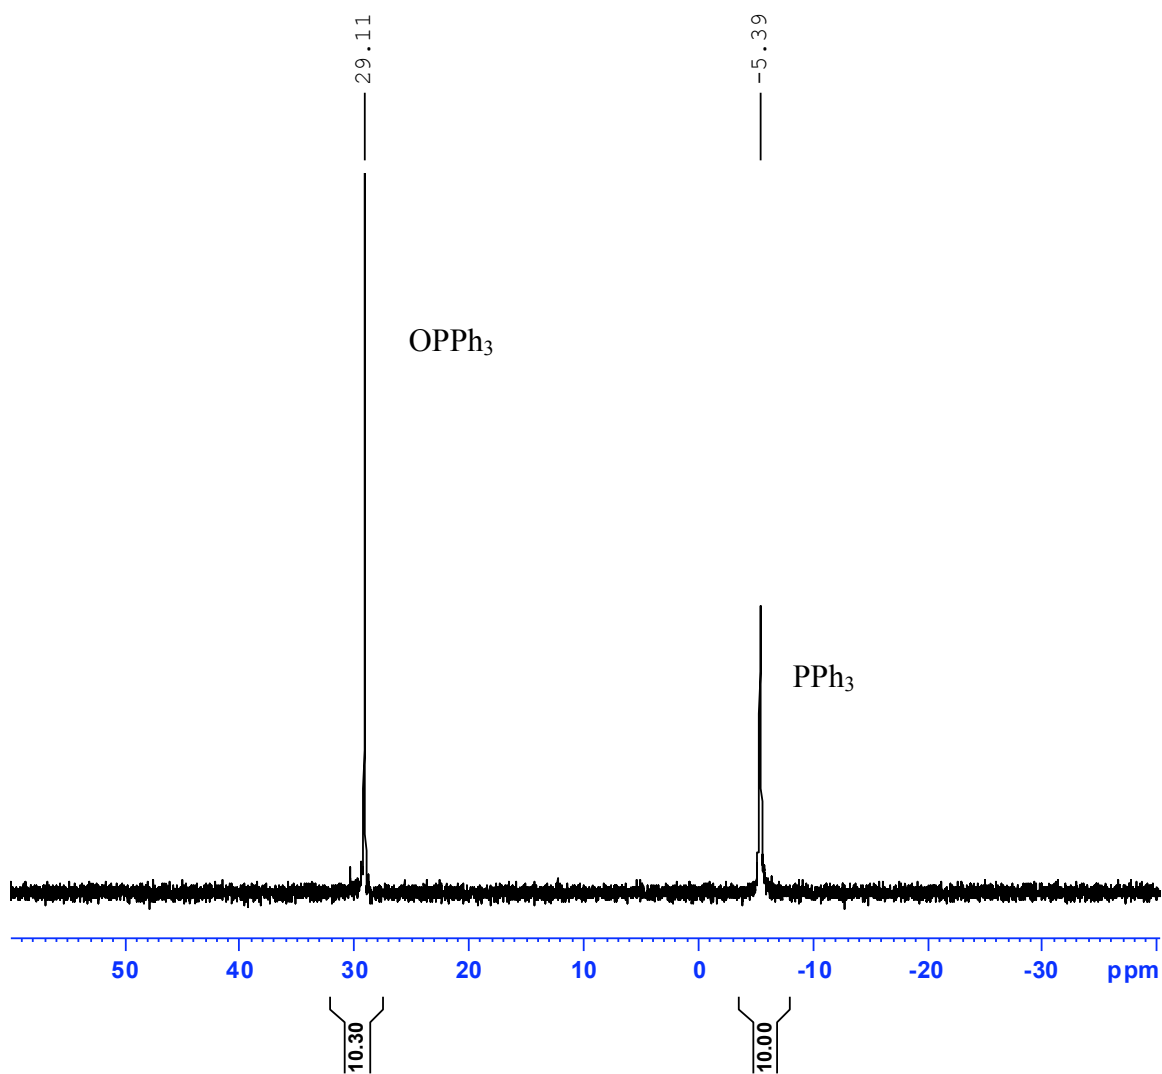

**Figure S6.** Representative  $^{31}\text{P}$  NMR spectrum for the catalytic reaction mixture of **1** (10  $\mu\text{M}$ ) and  $\text{PPh}_3$  (13 mM) following the addition of  $\text{O}_2$  gas and continuous irradiation ( $\lambda_{\text{irr}} > 400 \text{ nm}$ ) for 60 min in  $\text{C}_6\text{H}_{12}$  (3 mL). The reaction mixture was dried and redissolved in  $\text{CDCl}_3$  prior to obtaining the spectrum.
